# Supplementary material
Source: PubMed Central journal article supplement (PMC6699851)
Supplement: supp_RA118.006074_141084_1_supp_322014_pqqmd5.pdf [file supp_RA118.006074_141084_1_supp_322014_pqqmd5.pdf]

## **SUPPORTING INFORMATION**

**Extensive metabolic remodeling after limiting mitochondrial lipid burden  
is consistent with an improved metabolic health profile.**

Sujoy Ghosh<sup>1,2</sup>, Shawna E. Wicks<sup>3</sup>, Bolormaa Vandanmagsar<sup>3</sup>, Tamra M. Mendoza<sup>3</sup>, David S. Bayless<sup>3</sup>, J. Michael Salbaum<sup>4</sup>, Stephen P. Dearth<sup>5</sup>, Shawn R. Campagna<sup>5</sup>, Randall L. Mynatt<sup>3,6</sup>, and Robert C. Noland<sup>7</sup>

<sup>1</sup>Laboratory of Computational Biology, Pennington Biomedical Research Center, Baton Rouge, LA, 70808; <sup>2</sup>Program in Cardiovascular and Metabolic Disorders and Center for Computational Biology, Duke-National University of Singapore Medical School, Singapore, 169857; <sup>3</sup>Gene Nutrient Interactions Laboratory, Pennington Biomedical Research Center, Baton Rouge, LA, 70808; <sup>4</sup>Genomics Core Facility, Pennington Biomedical Research Center, Baton Rouge, LA, 70808; <sup>5</sup>Department of Chemistry, University of Tennessee, Knoxville, TN, 37996; <sup>6</sup>Transgenic Core Facility, Pennington Biomedical Research Center, Baton Rouge, LA, 70808; <sup>7</sup>Skeletal Muscle Metabolism Laboratory, Pennington Biomedical Research Center, Baton Rouge, LA, 70808

### **LIST OF MATERIALS INCLUDED:**

Figure S1

Figure S2

Figure S3

Figure S4

Figure S5

Figure S6

Figure S7

Table S1

Table S2

Table S3

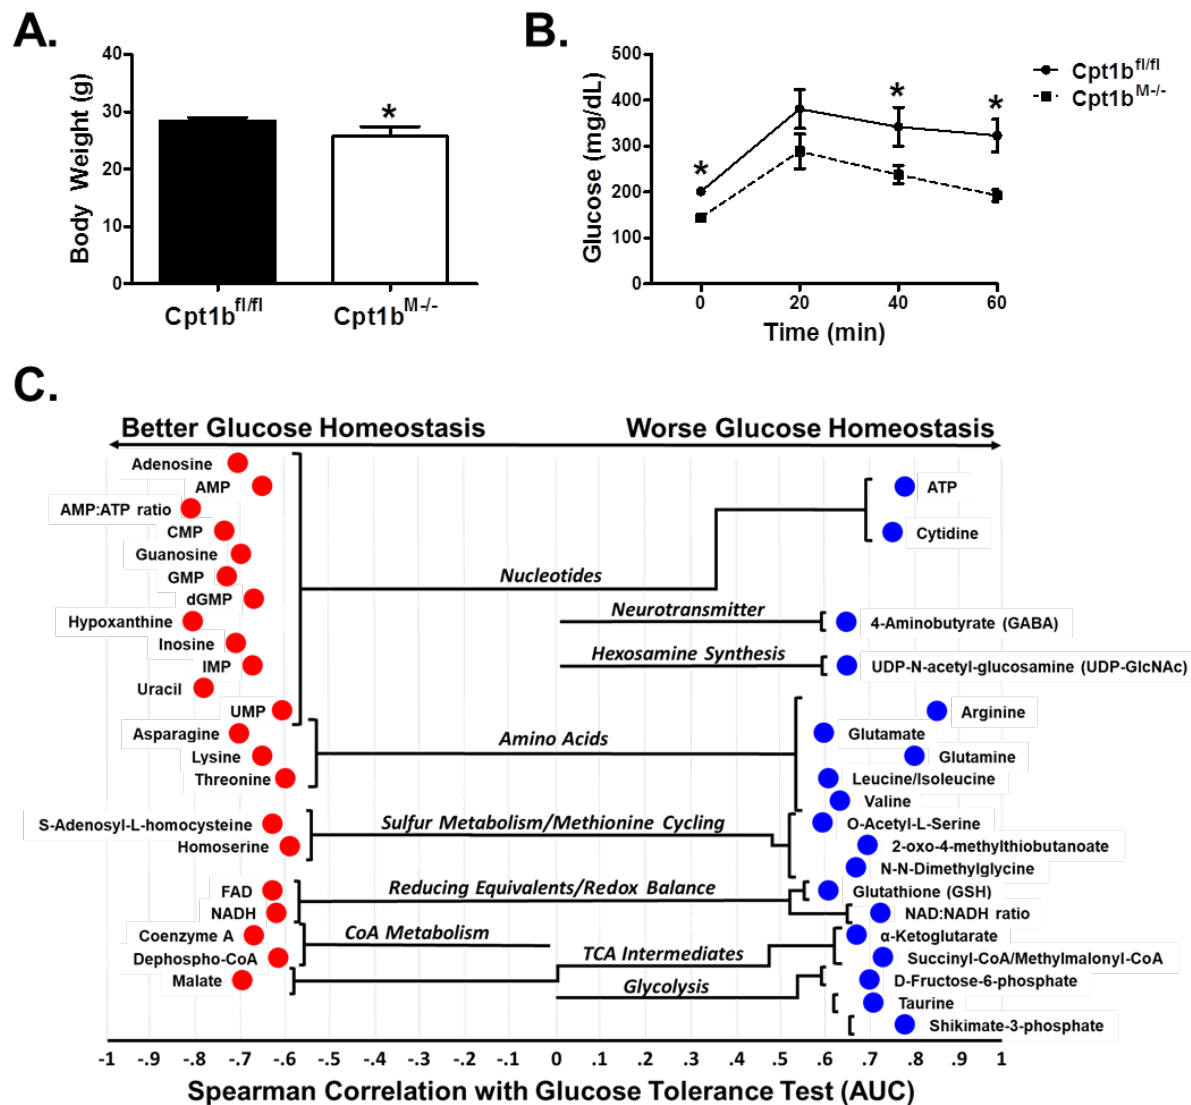

**Figure S1. Body weight and glucose tolerance test.** Cpt1b<sup>M-/-</sup> mice (n=8) have lower body weight (panel A) and improved glucose homeostasis vs. Cpt1b<sup>fl/fl</sup> (n=8) littermate controls. Area under the curve (AUC) calculated for the glucose tolerance test was significantly correlated ( $p \leq 0.0251$ ) with several identified metabolites and only relationships with a false discovery rate  $< 0.1$  are shown. Key: Red (negative spearman correlation); Blue (positive spearman correlation); \*  $p < 0.05$

## Pyrimidine Metabolism

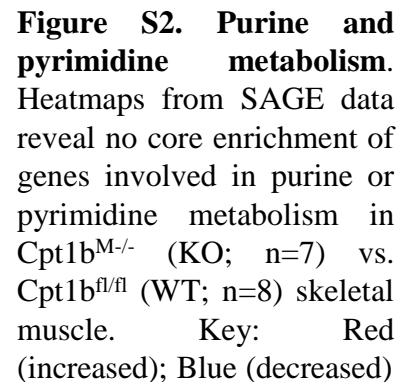

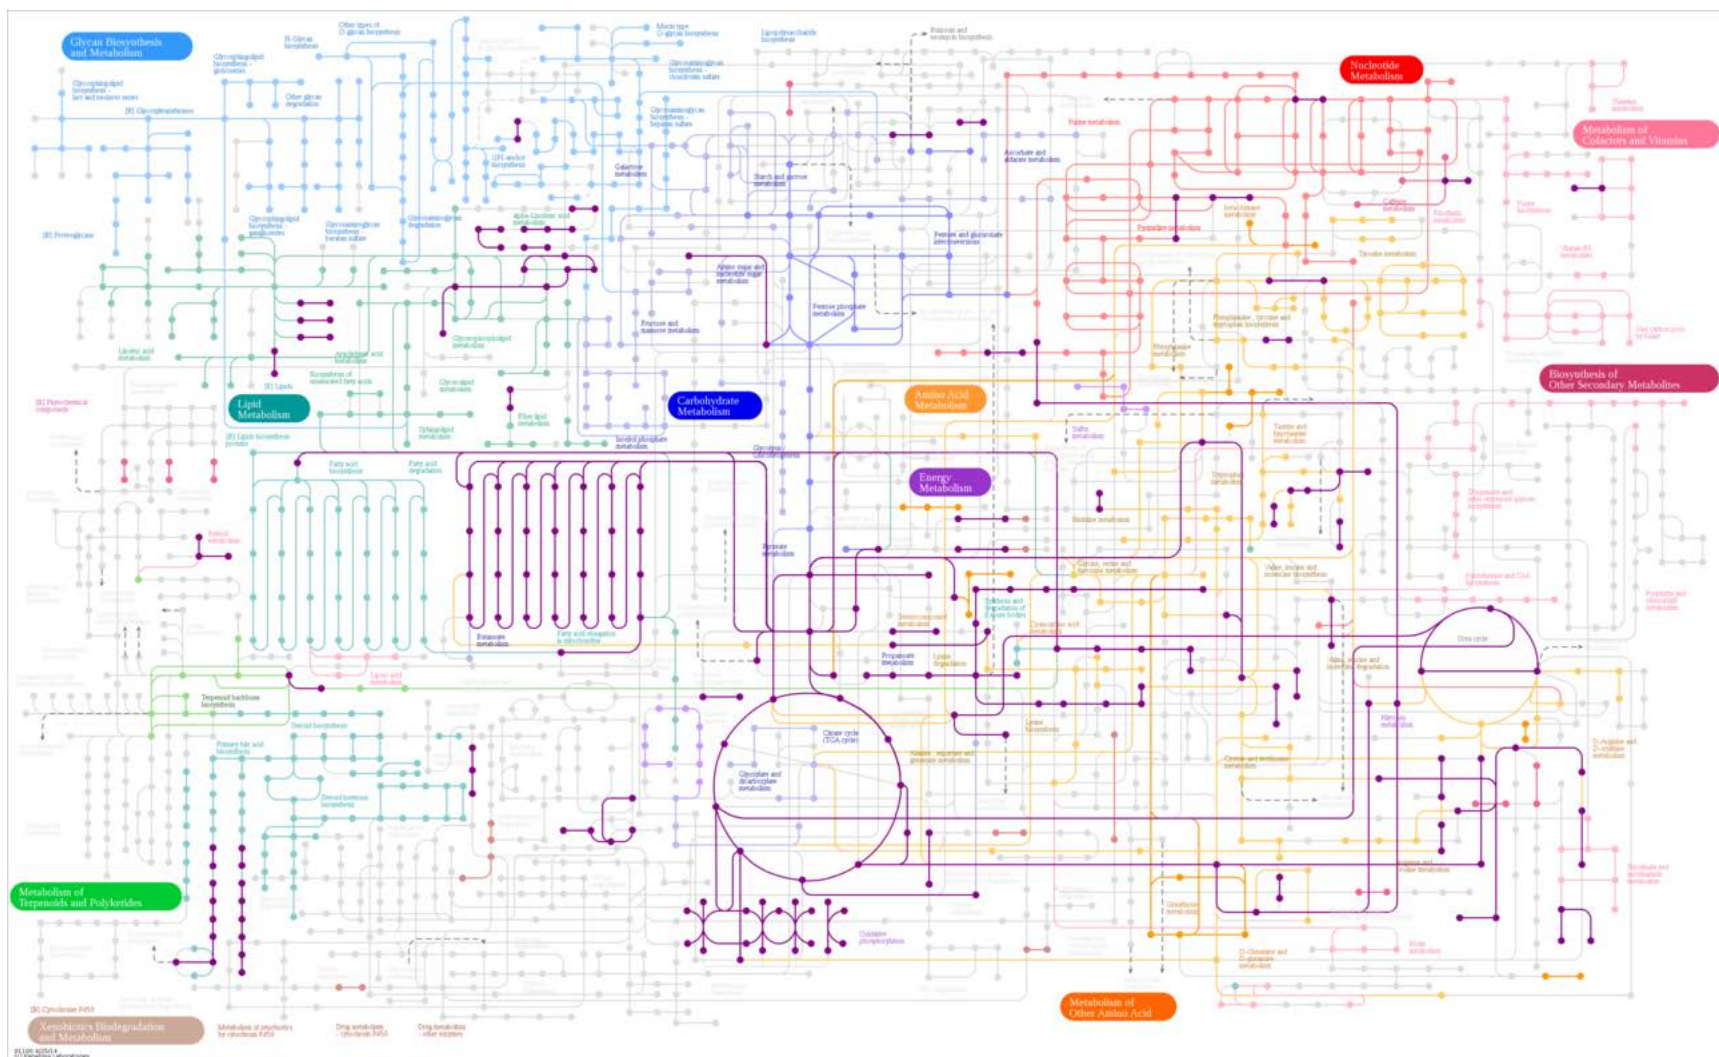

**Figure S3. Comprehensive KEGG network map from SAGE.** Gene set enrichment analysis (GSEA) of the SAGE data identified numerous metabolic pathways were altered in skeletal muscle from *Cpt1b<sup>M/-</sup>* (n=7) compared to *Cpt1b<sup>fl/fl</sup>* (n=8) mice and the results were used to develop a comprehensive KEGG network map that depicts alterations in these metabolic pathways. Significantly regulated pathways are identified in purple.

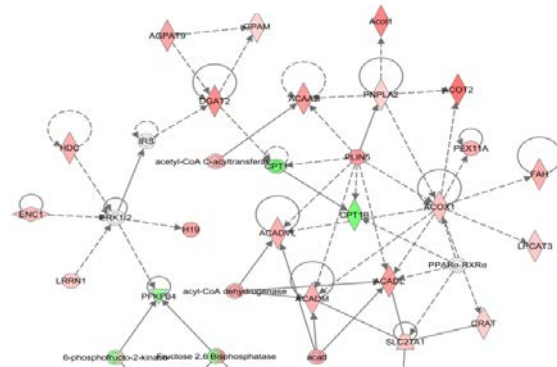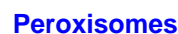[illegible]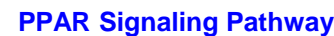[illegible]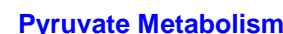

# Pyruvate Metabolism

This metabolic map illustrates the central role of Pyruvate in metabolism. Key pathways include:

- Glycolysis:** Conversion of Glucose to Pyruvate (EC 4.1.1.39, 4.1.1.40, 4.1.1.41, 4.1.1.42, 4.1.1.31).
- Gluconeogenesis:** Conversion of Pyruvate to Glucose (EC 4.1.1.40, 4.1.1.41, 4.1.1.42, 4.1.1.31).
- Lactate Metabolism:** Interconversion of Pyruvate and L-Lactate (EC 1.1.1.29, 1.1.1.70).
- Acidogenesis:** Conversion of Pyruvate to Acetyl-CoA (EC 2.3.1.12, 2.3.1.13, 2.3.1.14, 2.3.1.15, 2.3.1.16, 2.3.1.17, 2.3.1.18, 2.3.1.19, 2.3.1.20, 2.3.1.21, 2.3.1.22, 2.3.1.23, 2.3.1.24, 2.3.1.25, 2.3.1.26, 2.3.1.27, 2.3.1.28, 2.3.1.29, 2.3.1.30, 2.3.1.31, 2.3.1.32, 2.3.1.33, 2.3.1.34, 2.3.1.35, 2.3.1.36, 2.3.1.37, 2.3.1.38, 2.3.1.39, 2.3.1.40, 2.3.1.41, 2.3.1.42, 2.3.1.43, 2.3.1.44, 2.3.1.45, 2.3.1.46, 2.3.1.47, 2.3.1.48, 2.3.1.49, 2.3.1.50, 2.3.1.51, 2.3.1.52, 2.3.1.53, 2.3.1.54, 2.3.1.55, 2.3.1.56, 2.3.1.57, 2.3.1.58, 2.3.1.59, 2.3.1.60, 2.3.1.61, 2.3.1.62, 2.3.1.63, 2.3.1.64, 2.3.1.65, 2.3.1.66, 2.3.1.67, 2.3.1.68, 2.3.1.69, 2.3.1.70, 2.3.1.71, 2.3.1.72, 2.3.1.73, 2.3.1.74, 2.3.1.75, 2.3.1.76, 2.3.1.77, 2.3.1.78, 2.3.1.79, 2.3.1.80, 2.3.1.81, 2.3.1.82, 2.3.1.83, 2.3.1.84, 2.3.1.85, 2.3.1.86, 2.3.1.87, 2.3.1.88, 2.3.1.89, 2.3.1.90, 2.3.1.91, 2.3.1.92, 2.3.1.93, 2.3.1.94, 2.3.1.95, 2.3.1.96, 2.3.1.97, 2.3.1.98, 2.3.1.99, 2.3.1.100).
- Acetyl-CoA Metabolism:** Entry into the Citric Acid Cycle (EC 2.3.3.1, 2.3.3.1, 2.3.3.2, 2.3.3.3, 2.3.3.4, 2.3.3.5, 2.3.3.6, 2.3.3.7, 2.3.3.8, 2.3.3.9, 2.3.3.10, 2.3.3.11, 2.3.3.12, 2.3.3.13, 2.3.3.14, 2.3.3.15, 2.3.3.16, 2.3.3.17, 2.3.3.18, 2.3.3.19, 2.3.3.20, 2.3.3.21, 2.3.3.22, 2.3.3.23, 2.3.3.24, 2.3.3.25, 2.3.3.26, 2.3.3.27, 2.3.3.28, 2.3.3.29, 2.3.3.30, 2.3.3.31, 2.3.3.32, 2.3.3.33, 2.3.3.34, 2.3.3.35, 2.3.3.36, 2.3.3.37, 2.3.3.38, 2.3.3.39, 2.3.3.40, 2.3.3.41, 2.3.3.42, 2.3.3.43, 2.3.3.44, 2.3.3.45, 2.3.3.46, 2.3.3.47, 2.3.3.48, 2.3.3.49, 2.3.3.50, 2.3.3.51, 2.3.3.52, 2.3.3.53, 2.3.3.54, 2.3.3.55, 2.3.3.56, 2.3.3.57, 2.3.3.58, 2.3.3.59, 2.3.3.60, 2.3.3.61, 2.3.3.62, 2.3.3.63, 2.3.3.64, 2.3.3.65, 2.3.3.66, 2.3.3.67, 2.3.3.68, 2.3.3.69, 2.3.3.70, 2.3.3.71, 2.3.3.72, 2.3.3.73, 2.3.3.74, 2.3.3.75, 2.3.3.76, 2.3.3.77, 2.3.3.78, 2.3.3.79, 2.3.3.80, 2.3.3.81, 2.3.3.82, 2.3.3.83, 2.3.3.84, 2.3.3.85, 2.3.3.86, 2.3.3.87, 2.3.3.88, 2.3.3.89, 2.3.3.90, 2.3.3.91, 2.3.3.92, 2.3.3.93, 2.3.3.94, 2.3.3.95, 2.3.3.96, 2.3.3.97, 2.3.3.98, 2.3.3.99, 2.3.3.100).
- Other Pathways:** Pyruvate can be converted to Lactate, Acetyl-CoA, and other metabolites like Oxaloacetate, Malate, and Fumarate.

The diagram also shows the connection to the Citrate cycle and the synthesis of various biomolecules like Amino acids, Nucleotides, and Lipids.

**Figure S4. Cpt1b network, peroxisomes, PPAR signaling, and pyruvate handling pathway analysis from SAGE.** Integrative Pathway Analysis (IPA) of the SAGE data was used to develop a Network Analysis directly tied to Cpt1b expression (A), while gene set enrichment analysis (GSEA) identified upregulation of peroxisomes (B), PPAR signaling (C) and pyruvate handling (D) pathways in skeletal muscle of Cpt1b<sup>M/-</sup> mice. Upregulated genes are identified in red, while downregulated genes are shown in green (A) or blue (B). Key: Red (activation/upregulation); Green (inhibition/downregulation); Multi-colored (multiple isoforms which exhibit opposing changes); Solid Lines (direct relationship); Dashed Lines (indirect relationship); Vertical Diamond (enzyme); Horizontal Diamond (peptidase); Downward Triangle (kinase); Upward Triangle (phosphatase). Data from Cpt1b<sup>M/-</sup> (n=7) and Cpt1b<sup>fl/fl</sup> (n=8) mice were used for the analysis.

**A.**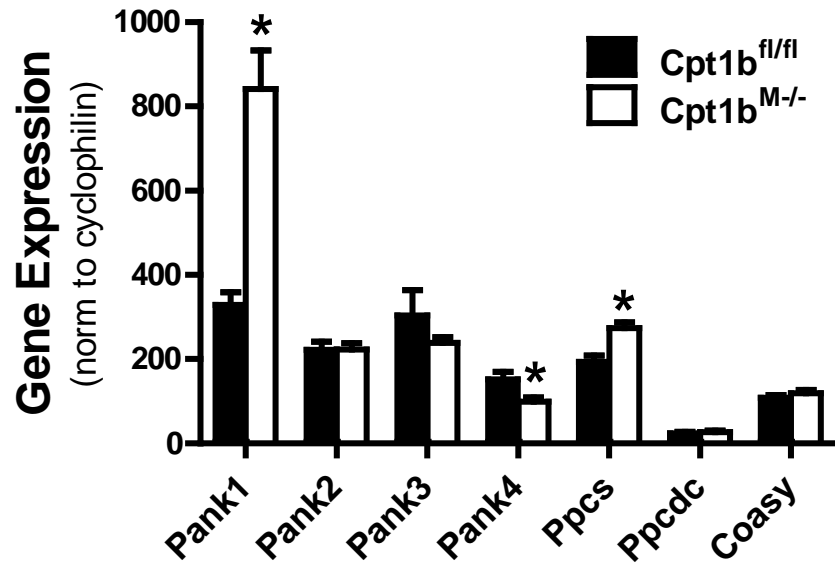**B.**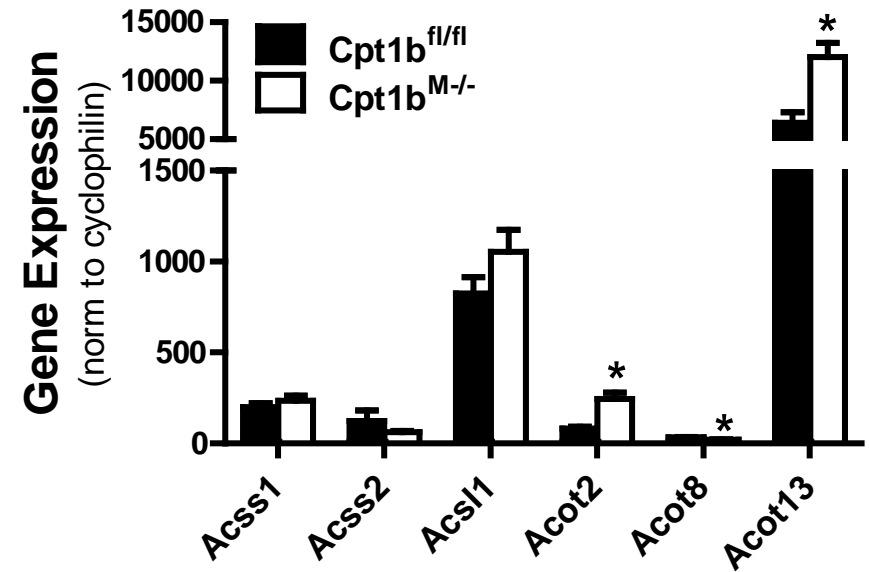

**Figure S5. Genes involved in CoA metabolism.** Enrichment of key genes involved in CoA biosynthesis (A), as well as acyl-CoA metabolism (B) identified within the SAGE dataset was confirmed via RT-PCR. Data are normalized to cyclophilin. (n=8 per genotype)

\* p<0.05

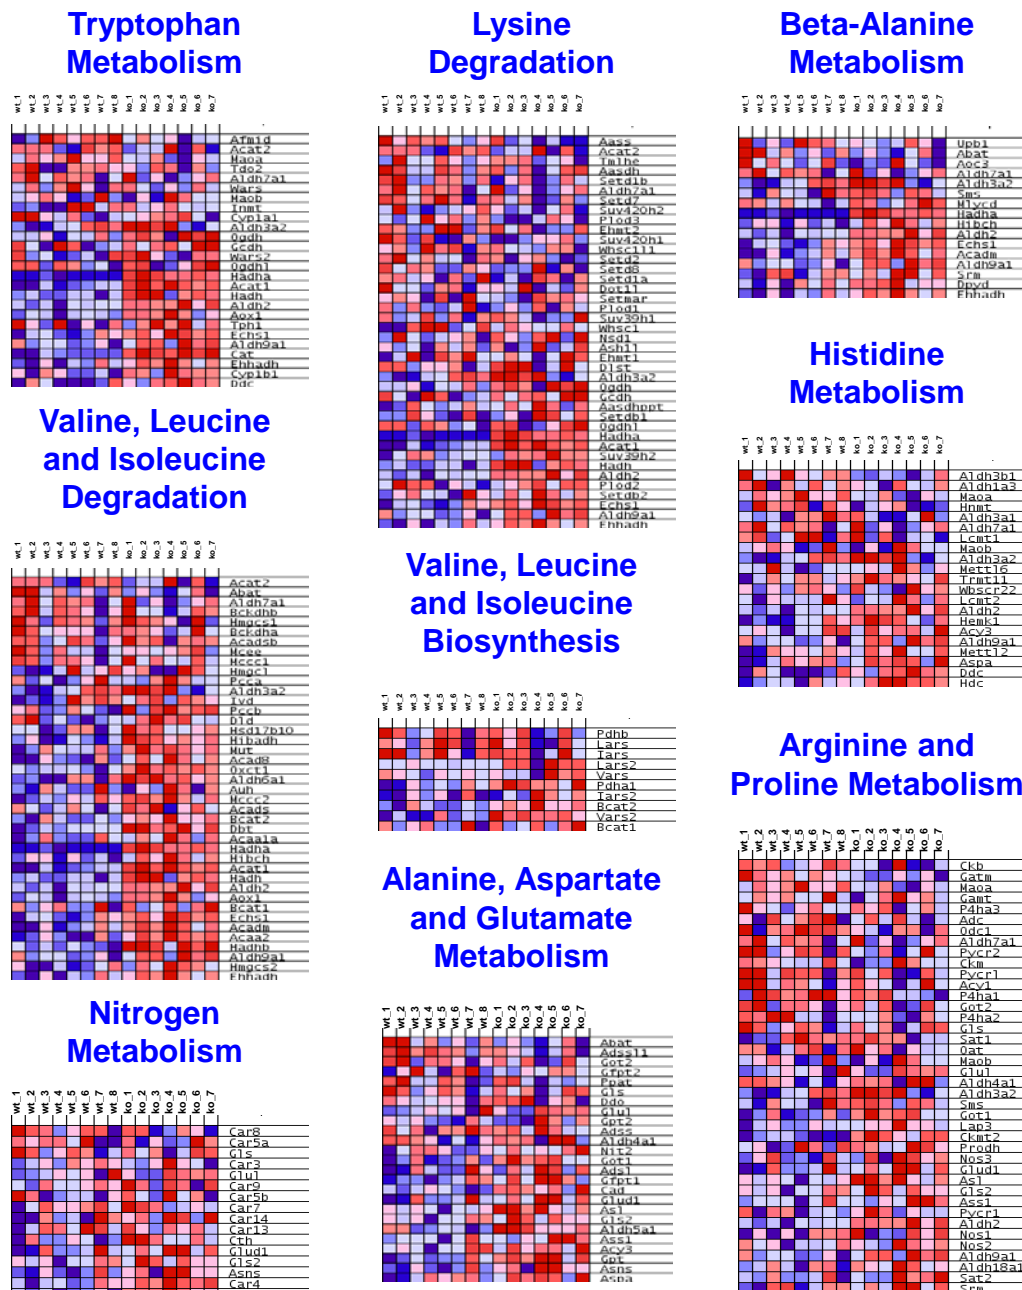

**Figure S6. Alterations in amino acid metabolism pathways in *Cpt1b*<sup>M-/-</sup> mice.** Heatmaps from SAGE data reveal substantial remodeling of genes involved in several pathways of amino acid metabolism in *Cpt1b*<sup>M-/-</sup> (KO; n=7) vs. *Cpt1b*<sup>fl/fl</sup> (WT; n=8) skeletal muscle. Key: Red (increased); Blue (decreased)

A.

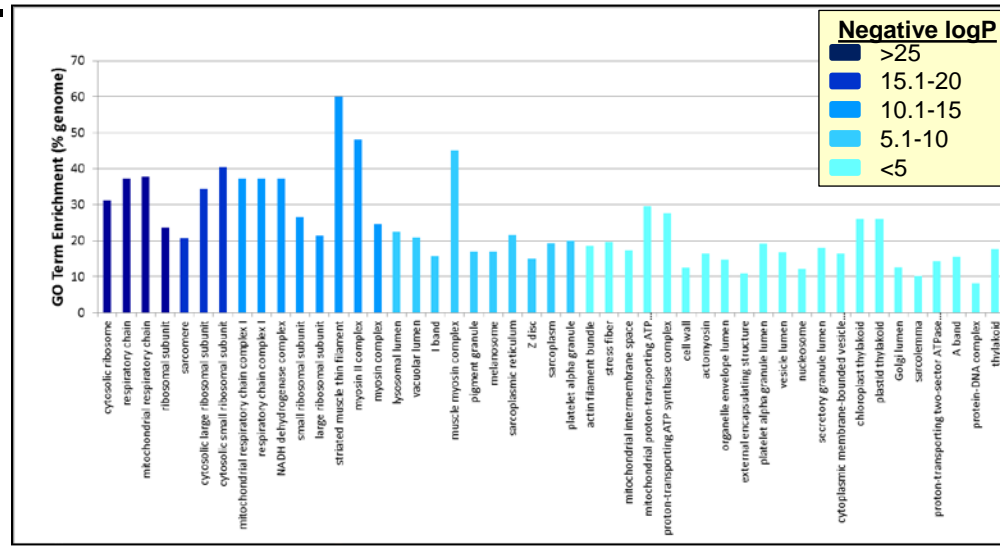

B.

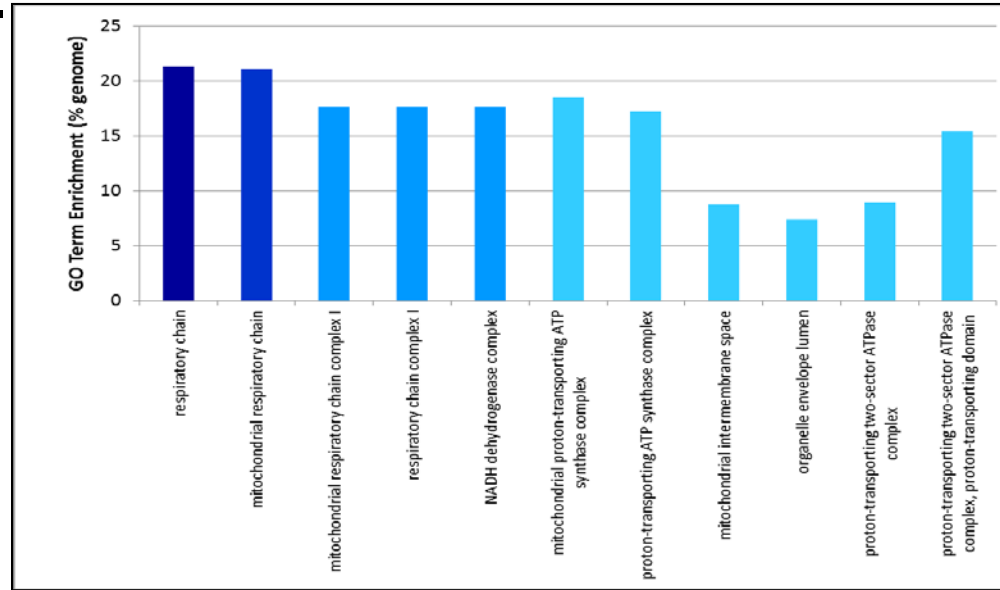

**Figure S7. Cellular localization of proteins identified to be regulated in *Cpt1b*<sup>M/-</sup> mice.** Gene ontology analysis of the proteomics dataset was used to identify the cellular compartmentalization of differentially expressed proteins (A). Several of the most robustly regulated factors were localized to the mitochondrion (B). Data from *Cpt1b*<sup>M/-</sup> (n=7) and *Cpt1b*<sup>fl/fl</sup> (n=8) mice were used for the analysis.

| KEGG Pathway                                | SIZE | NES   | NOM p-val | FDR q-val | Regulation |
|---------------------------------------------|------|-------|-----------|-----------|------------|
| Valine, Leucine and Isoleucine Degradation  | 41   | -2.04 | 0.00      | 0.00      | Up_KO      |
| Peroxisome                                  | 69   | -1.97 | 0.00      | 0.01      | Up_KO      |
| Propanoate Metabolism                       | 28   | -1.89 | 0.00      | 0.01      | Up_KO      |
| Tryptophan Metabolism                       | 26   | -1.92 | 0.00      | 0.01      | Up_KO      |
| Fatty Acid Metabolism                       | 32   | -1.89 | 0.00      | 0.01      | Up_KO      |
| PPAR Signaling Pathway                      | 51   | -1.85 | 0.00      | 0.01      | Up_KO      |
| Beta Alanine Metabolism                     | 16   | -1.79 | 0.01      | 0.02      | Up_KO      |
| Alanine, Aspartate and Glutamate Metabolism | 25   | -1.72 | 0.01      | 0.04      | Up_KO      |
| Oxidative Phosphorylation                   | 95   | -1.69 | 0.00      | 0.05      | Up_KO      |
| Nitrogen Metabolism                         | 16   | -1.70 | 0.01      | 0.05      | Up_KO      |
| Terpenoid Backbone Biosynthesis             | 14   | -1.59 | 0.04      | 0.09      | Up_KO      |
| Glycerolipid Metabolism                     | 34   | -1.61 | 0.01      | 0.09      | Up_KO      |
| Arginine and Proline Metabolism             | 40   | -1.58 | 0.02      | 0.09      | Up_KO      |
| TCA Cycle                                   | 29   | -1.60 | 0.01      | 0.09      | Up_KO      |
| Proximal Tubule Bicarbonate Reclamation     | 19   | -1.55 | 0.03      | 0.11      | Up_KO      |
| Histidine Metabolism                        | 21   | -1.54 | 0.05      | 0.11      | Up_KO      |
| Lysine Degradation                          | 40   | -1.45 | 0.04      | 0.17      | Up_KO      |
| Pyruvate Metabolism                         | 31   | -1.45 | 0.03      | 0.17      | Up_KO      |
| Retinol Metabolism                          | 15   | -1.47 | 0.06      | 0.17      | Up_KO      |
| Valine, Leucine and Isoleucine Biosynthesis | 10   | -1.46 | 0.06      | 0.17      | Up_KO      |
| Drug Metabolism Other Enzymes               | 16   | -1.42 | 0.09      | 0.19      | Up_KO      |
|                                             |      |       |           |           |            |
| O Glycan Biosynthesis                       | 18   | 1.74  | 0.01      | 0.16      | Dn_KO      |
| ECM Receptor Interaction                    | 69   | 1.67  | 0.00      | 0.22      | Dn_KO      |
| Natural Killer Cell-Mediated Cytotoxicity   | 75   | 1.64  | 0.00      | 0.24      | Dn_KO      |
| Systemic Lupus Erythematosus                | 44   | 1.77  | 0.00      | 0.25      | Dn_KO      |

**Table S1: GSEA of KEGG Pathway Data**

| Category                            | Biofunction                   | Predicted Activation State | Activation z-score | p-Value  | # of Molecules |
|-------------------------------------|-------------------------------|----------------------------|--------------------|----------|----------------|
| Lipid Metabolism                    | Metabolism of Triacylglycerol | Increased                  | 2.587              | 2.45E-13 | 14             |
| Lipid Metabolism                    | Metabolism of Acylglycerol    | Increased                  | 2.581              | 2.72E-12 | 15             |
| Lipid Metabolism                    | Transport of Fatty Acid       | Increased                  | 2.563              | 1.31E-08 | 9              |
| Lipid Metabolism                    | Cleavage of Lipid             | Increased                  | 2.405              | 1.30E-03 | 8              |
| Lipid Metabolism                    | Synthesis of Acylglycerol     | Increased                  | 2.397              | 4.09E-07 | 9              |
| Lipid Metabolism                    | Synthesis of Triacylglycerol  | Increased                  | 2.386              | 7.98E-08 | 8              |
| Carbohydrate Metabolism             | Concentration of D-glucose    | Increased                  | 2.248              | 2.18E-14 | 25             |
| Molecular Transport                 | Transport of Carboxylic Acid  | Increased                  | 2.734              | 9.97E-08 | 10             |
| Organismal Functions                | Thermoregulation              | Increased                  | 2.345              | 1.35E-05 | 10             |
| Cell Morphology                     | Size of Muscle Cells          | Increased                  | 2.393              | 1.07E-03 | 6              |
| Organismal Development              | Size of Body                  | Increased                  | 2.347              | 1.95E-03 | 21             |
|                                     |                               |                            |                    |          |                |
| Metabolic Disease                   | Hyperglycemia                 | Decreased                  | -2.121             | 4.03E-05 | 9              |
| Metabolic Disease                   | Hypoglycemia                  | Decreased                  | -2.906             | 6.77E-12 | 14             |
| Metabolic Disease                   | Glucose Metabolism Disorder   | Decreased                  | -3.185             | 8.22E-13 | 46             |
| Gastrointestinal Disease            | Hepatic Steatosis             | Decreased                  | -2.377             | 2.56E-12 | 20             |
| Organismal Injury and Abnormalities | Fatigue                       | Decreased                  | -2.236             | 9.28E-06 | 6              |
| Cardiovascular Disease              | Hypertrophy of Heart          | Decreased                  | -2.654             | 3.54E-07 | 14             |
| Organismal Survival                 | Perinatal Death               | Decreased                  | -2.92              | 9.62E-04 | 17             |
| Organismal Survival                 | Organismal Death              | Decreased                  | -3.892             | 7.29E-06 | 53             |

**Table S2. Biofunctions**

| <b>Gene symbol</b> | <b>Ref.Seq ID</b> | <b>Forward Primer</b> | <b>Reverse Primer</b> |
|--------------------|-------------------|-----------------------|-----------------------|
| <i>Pank1</i>       | NM_001114339.2    | CCATGCACTTGTTTCATCCAG | CAAACAGTCCAGCTCATCCA  |
| <i>Pank2</i>       | NM_153501.2       | TGGAAACATGATGAGCAAGG  | CCGACAAATACGACCTGGTT  |
| <i>Pank3</i>       | NM_145962.2       | TCAGATTTCCAACCCAGGAC  | GTTTGTGCAGGTGGAGGTTT  |
| <i>Pank4</i>       | NM_001305804.1    | GCAAGCAGTTTTGGGAAGTC  | CCCAAAGTAGACCCTGTCCA  |
| <i>Ppcs</i>        | NM_026494.3       | CGAAATGCCTGAACACAAGA  | ATGATGTCCGGGTCTGTCTC  |
| <i>Ppcdc</i>       | NM_176831.4       | GATGCCAACACTCTGGGGAA  | CAGGGAATCTCCACGTAGCC  |
| <i>Coasy</i>       | NM_001305982.1    | TATGCTGCTTGAAGCTGGCT  | ACCACGTTGCTCTGCTCTAC  |
| <i>Dcakd</i>       | NM_026551.3       | GGTATTCCAACAGCTGGGCT  | ATGTCGCCATTCTCCAGCAA  |
| <i>Acss1</i>       | NM_080575.2       | ATCCCGCTGTTCCAGAGACT  | CAGCACAATGAAGGCAAATG  |
| <i>Acss2</i>       | NM_019811.3       | ACTTGCGACAAAGTTGCTT   | GCTGAACTGACACACCTGGA  |
| <i>Acs11</i>       | NM_001302163.1    | AAGCCACCATGTGACCTCTC  | TCAAGGACTGCTGATCTTCG  |
| <i>Acot2</i>       | NM_134188.3       | CCCCAAGAGCATAGAAACCA  | AGCCCAATTCCAGGTCCTTT  |
| <i>Acot8</i>       | NM_133240.2       | AGAAGACCTGCTGGATCACG  | TCAGCCCCACTCGATACTTC  |
| <i>Acot13</i>      | NM_025790.2       | AGCATGACCCAGAACCTACG  | GCTGCTCTTCCACCTTCATC  |

**Table S3. Primers**
